# Supplementary material
Source: publisher figshare collection journal article supplement (https://frontiersin.figshare.com/ndownloader/files/24204335)
Supplement: Supplementary file 1 [file 24204335]

## Sheet: Sheet1
Timestamp	Plastic flux [items/h/segment]
	Left	Middle	Right
'29-Apr-2019 11:06:00'	180	30	240
'29-Apr-2019 11:23:00'	60	0	420
'29-Apr-2019 11:37:00'	720	90	960
'29-Apr-2019 11:53:00'	2340	180	330
'29-Apr-2019 12:15:00'	90	150	210
'29-Apr-2019 12:29:00'	270	210	240
'29-Apr-2019 12:53:00'	570	690	60
'29-Apr-2019 13:20:00'	0	780	120
'29-Apr-2019 13:32:00'	0	630	180
'29-Apr-2019 13:38:00'	0	NaN	NaN
'29-Apr-2019 14:57:00'	0	0	0
'29-Apr-2019 15:19:00'	150	90	0
'29-Apr-2019 15:47:00'	210	60	0
'30-Apr-2019 10:37:00'	150	1410	0
'30-Apr-2019 11:05:00'	90	780	0
'30-Apr-2019 10:33:00'	90	1380	30
'30-Apr-2019 10:52:00'	30	1110	30
'30-Apr-2019 11:14:00'	30	870	0
'30-Apr-2019 11:33:00'	0	630	0
'30-Apr-2019 11:58:00'	60	330	30
'30-Apr-2019 12:15:00'	NaN	180	30
'30-Apr-2019 13:42:00'	30	0	120
'30-Apr-2019 14:02:00'	210	180	30
'30-Apr-2019 14:46:00'	270	120	0
'30-Apr-2019 15:25:00'	270	180	0
'30-Apr-2019 15:48:00'	90	0	90
'01-May-2019 09:27:00'	180	2310	0
'01-May-2019 09:30:00'	NaN	2520	NaN
'02-May-2019 10:03:00'	180	840	30
'02-May-2019 10:23:00'	240	1110	150
'02-May-2019 10:44:00'	540	1080	180
'02-May-2019 11:05:00'	60	1110	0
'02-May-2019 11:32:00'	210	1650	30
'02-May-2019 11:55:00'	210	1380	60
'02-May-2019 12:27:00'	60	1410	30
'02-May-2019 14:00:00'	1110	870	210
'02-May-2019 14:25:00'	1290	1380	450
'02-May-2019 15:03:00'	1050	990	90
'02-May-2019 15:32:00'	690	1440	270
'02-May-2019 15:55:00'	540	1170	90
'03-May-2019 10:12:00'	330	750	240
'03-May-2019 10:37:00'	360	1140	0
'03-May-2019 11:02:00'	90	1230	0
'03-May-2019 11:25:00'	30	1560	120
'03-May-2019 11:53:00'	60	1230	30
'03-May-2019 12:15:00'	360	1680	30
'03-May-2019 13:44:00'	300	660	30
'03-May-2019 14:05:00'	2310	1560	300
'03-May-2019 14:28:00'	1440	1710	600
'03-May-2019 14:59:00'	1050	2430	240
'03-May-2019 15:40:00'	810	1620	120
'04-May-2019 09:48:00'	360	3420	30
'04-May-2019 10:03:00'	390	2280	0
'04-May-2019 10:30:00'	300	2430	60
'04-May-2019 11:05:00'	90	2250	0
'04-May-2019 11:35:00'	360	2370	30
'04-May-2019 12:00:00'	150	2610	210
'04-May-2019 14:45:00'	360	1080	1170
'04-May-2019 15:10:00'	1920	1680	450
'04-May-2019 15:35:00'	2040	1590	840
'04-May-2019 16:00:00'	1920	2160	990
